# Supplementary material
Source: PubMed Central journal article supplement (PMC4408946)
Supplement: supp_kwu331_kwu331supp.pdf [file supp_kwu331_kwu331supp.pdf]

**Web Table 1.** Numbers (%) of Those Who Died, Were Alive but did not Participate and Those Who Participated in the AGES-Reykjavik Study by Mid-life BMI Category Measured in the Reykjavik Study

|                                                 | <b>Mid-life Body Mass Index (BMI, kg/m<sup>2</sup>)</b> |                 |               |
|-------------------------------------------------|---------------------------------------------------------|-----------------|---------------|
|                                                 | <b>&lt;25</b>                                           | <b>25 to 30</b> | <b>&gt;30</b> |
| Died before 2002                                | 3515 (37.8)                                             | 2715 (40.9)     | 1305 (44.8)   |
| Alive but did not participate in the AGES Study | 2681 (28.9)                                             | 2007 (30.2)     | 908 (31.2)    |
| Alive and participated in the AGES Study        | 3095 (33.3)                                             | 1916 (28.9)     | 701 (24.1)    |

**Web Table 2.** Associations of Overweight and Obesity in Midlife (1967-1987) Body Mass Index (kg/m<sup>2</sup>) with MRI Measures of Brain Structure and Vascular Damage in Late-life (2002-2006) in the AGES-Reykjavik Study (n=3,864). Comparisons Between Unweighted and Weighted Models Using IPCW. All Models are Fully Adjusted for Sex, Age in Midlife, Follow-up Years and Intracranial Volume; APOE ε4 allele (y/n), Educational Level, Physical Activity Level, Systolic and Diastolic Blood Pressure and Serum Cholesterol Level in Mid-life; and for Coronary Calcium, Prevalent Coronary Heart Disease, Hypertension, Diabetes and Depression; Drinking and Smoking Habits in Late-life. % TBV is Further Adjusted for Brain Infarcts, and Dementia also for % WMLV.

| Body Mass Index               | % TBV              | % WMLV               | Brain infarcts    | Brain microbleeds | Dementia          |
|-------------------------------|--------------------|----------------------|-------------------|-------------------|-------------------|
|                               | β* [95% CI]        | β* [95% CI]          | RR† [95% CI]      | RR† [95% CI]      | RR† [95% CI]      |
| <b>Main models</b>            |                    |                      |                   |                   |                   |
| Normal weight (reference)     | 1                  | 1                    | 1                 | 1                 | 1                 |
| Overweight                    | 0.10 (-0.12, 0.32) | -0.07 (-0.13, -0.01) | 1.08 (0.92, 1.27) | 0.91 (0.67, 1.25) | 1.22 (0.92, 1.63) |
| Obese                         | 0.05 (-0.34, 0.45) | -0.10 (-0.20, 0.00)  | 0.82 (0.61, 1.10) | 0.69 (0.37, 1.32) | 0.91 (0.49, 1.72) |
| <b>Weighted models (IPCW)</b> |                    |                      |                   |                   |                   |
| Normal weight (reference)     | 1                  | 1                    | 1                 | 1                 | 1                 |
| Overweight                    | 0.08 (-0.15, 0.31) | -0.06 (-0.12, 0.00)  | 1.10 (0.92, 1.30) | 0.90 (0.64, 1.24) | 1.24 (0.91, 1.69) |
| Obese                         | 0.08 (-0.34, 0.50) | -0.10 (-0.20, 0.00)  | 0.81 (0.59, 1.11) | 0.70 (0.36, 1.33) | 1.06 (0.56, 2.03) |

Abbreviations: BMI , body mass index (normal weight: 18.5≤BMI<25; overweight: 25≤BMI<30; obese: BMI≥30 kg/m<sup>2</sup>); % TBV , total brain volume (relative to intracranial volume); % WMLV , white matter lesions volume (relative to intracranial volume); RR , relative risks; CI , confidence intervals; SE , standard error; IPCW, inverse-probability censoring weights.

\* Beta coefficients from fully adjusted linear regression models of brain volumes adjusted for intracranial volume.

† Relative risks representing the risk of brain infarcts (two or more) (y/n), microbleeds (two or more) (y/n), and dementia from Poisson models with robust 95% confidence intervals.
